# Supplementary material for: Accelerated denaturation bubble-mediated strand exchange amplification for rapid and accurate detection of canine parvovirus
Source: Royal Society of Chemistry journal article supplement (doi:10.1039/d0ay01751e), 2020-01-01
Supplement: d0ay01751e4.pdf [file d0ay01751e4.pdf]

## Supplementary information

### Thermal cycling optimization

Since the reaction temperature slightly lower than primers'  $T_m$  value is the both beneficial for combination of primers to target and the enzymes maintaining high activity, therefore 61 °C was first fixed as  $T_{min}$  for  $T_{max}$  optimization. As shown in Fig.S1A, the  $T_{max}$  of 74 °C exhibited the lowest  $T_t$  value. Then 74 °C was fixed as  $T_{max}$  for  $T_{min}$ , the result of which was shown in Fig.S1B. As expected, the reaction with 61 °C as  $T_{min}$  showed the lowest  $T_t$  value. In summary, the thermal cycling at the range of 74 °C to 61 °C was most beneficial for ASEA reaction, thus 74 °C and 61 °C were employed as  $T_{max}$  and  $T_{min}$  in this work.

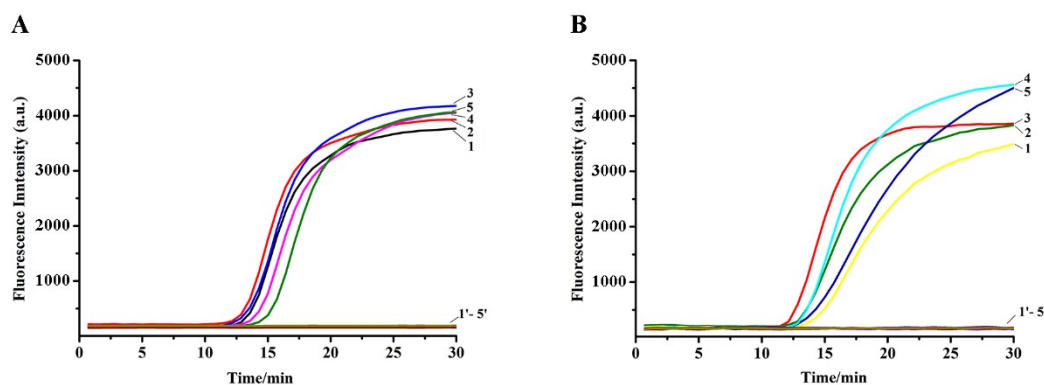

**Fig.S1.**  $T_{max}$  and  $T_{min}$  optimization of ASEA for CPV detection. (A)  $T_{max}$  optimization at  $T_{min}$  of 61 °C. ASEA reactions were carried out at the  $T_{max}$  of (1) 75 °C, (2) 74 °C, (3) 73 °C, (4) 72 °C and (5) 71 °C, respectively. 1'-5' represented corresponding NTC. (b)  $T_{min}$  optimization at the  $T_{max}$  of 72 °C. ASEA reactions were carried out at the  $T_{min}$  of (1) 63 °C, (2) 62 °C, (3) 61 °C, (4) 60 °C and (5) 59 °C, respectively. 1'-5' represented corresponding NTC. The CPV genomic DNA at the concentration of  $1.0 \times 10^{-13}$  M was employed for thermal cycling optimization.

## Determination of ASEA's LOD

In order to confirm the LOD of this ASEA, a series of CPV genomic DNA of the concentration between  $1.0 \times 10^{-17}$  M to  $1.0 \times 10^{-18}$  M, specifically,  $1.0 \times 10^{-17}$  M,  $8.0 \times 10^{-18}$  M,  $6.0 \times 10^{-18}$  M,  $4.0 \times 10^{-18}$  M,  $2.0 \times 10^{-18}$  M and  $1.0 \times 10^{-18}$  M, was employed as template for ASEA detection. The result showed fluorescence accumulated in the reaction with  $1.0 \times 10^{-17}$  M and  $8.0 \times 10^{-18}$  M CPV genomic DNA, but no fluorescence signals were detected in the reaction with CPV genomic DNA lower than  $8.0 \times 10^{-18}$  M (Fig.S2), demonstrated the LOD of ASEA was approximately  $8.0 \times 10^{-18}$  M (equivalent to 4.8 copies/ $\mu$ L).

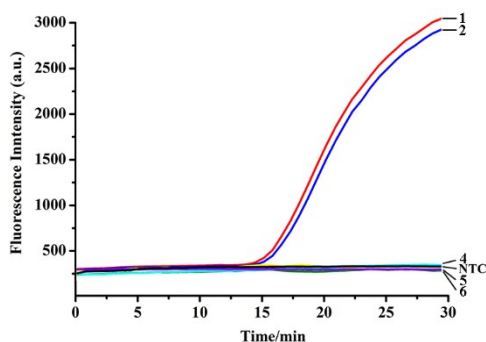

**Fig.S2.** The fluorescence curves of ASEA reactions with the template of CPV genomic DNA at the concentration of (1)  $1.0 \times 10^{-17}$  M, (2)  $8.0 \times 10^{-18}$  M, (3)  $6.0 \times 10^{-18}$  M, (4)  $4.0 \times 10^{-18}$  M, (5)  $2.0 \times 10^{-18}$  M, and (6)  $1.0 \times 10^{-18}$  M. NTC represented no target control.
