# Supplementary figures and images for: Accelerated denaturation bubble-mediated strand exchange amplification for rapid and accurate detection of canine parvovirus
Source: Royal Society of Chemistry journal article supplement (doi:10.1039/d0ay01751e), 2020-01-01

**A**

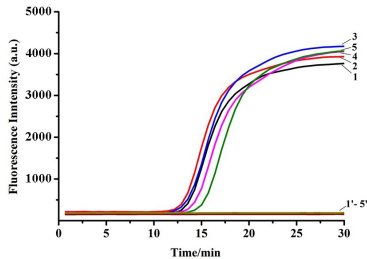

**B**

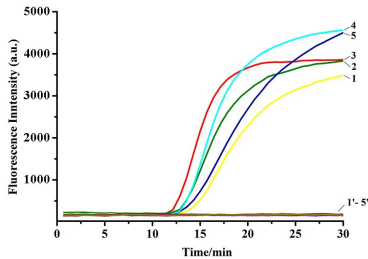

Supplement: d0ay01751e2.pdf [file d0ay01751e2.pdf]

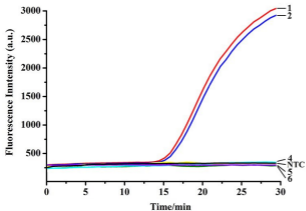

Supplement: d0ay01751e3.pdf [file d0ay01751e3.pdf]
